# Supplementary material
Source: publisher figshare collection journal article supplement (https://tandf.figshare.com/articles/dataset/_/7000769)
Supplement: Supplementary file 1 [file 1]

## **Supporting material to the paper**

Soil pH and phosphorus drive species composition and richness in semi-natural heathlands and grasslands unaffected by twentieth-century agricultural intensification. *Plant Ecology & Diversity*

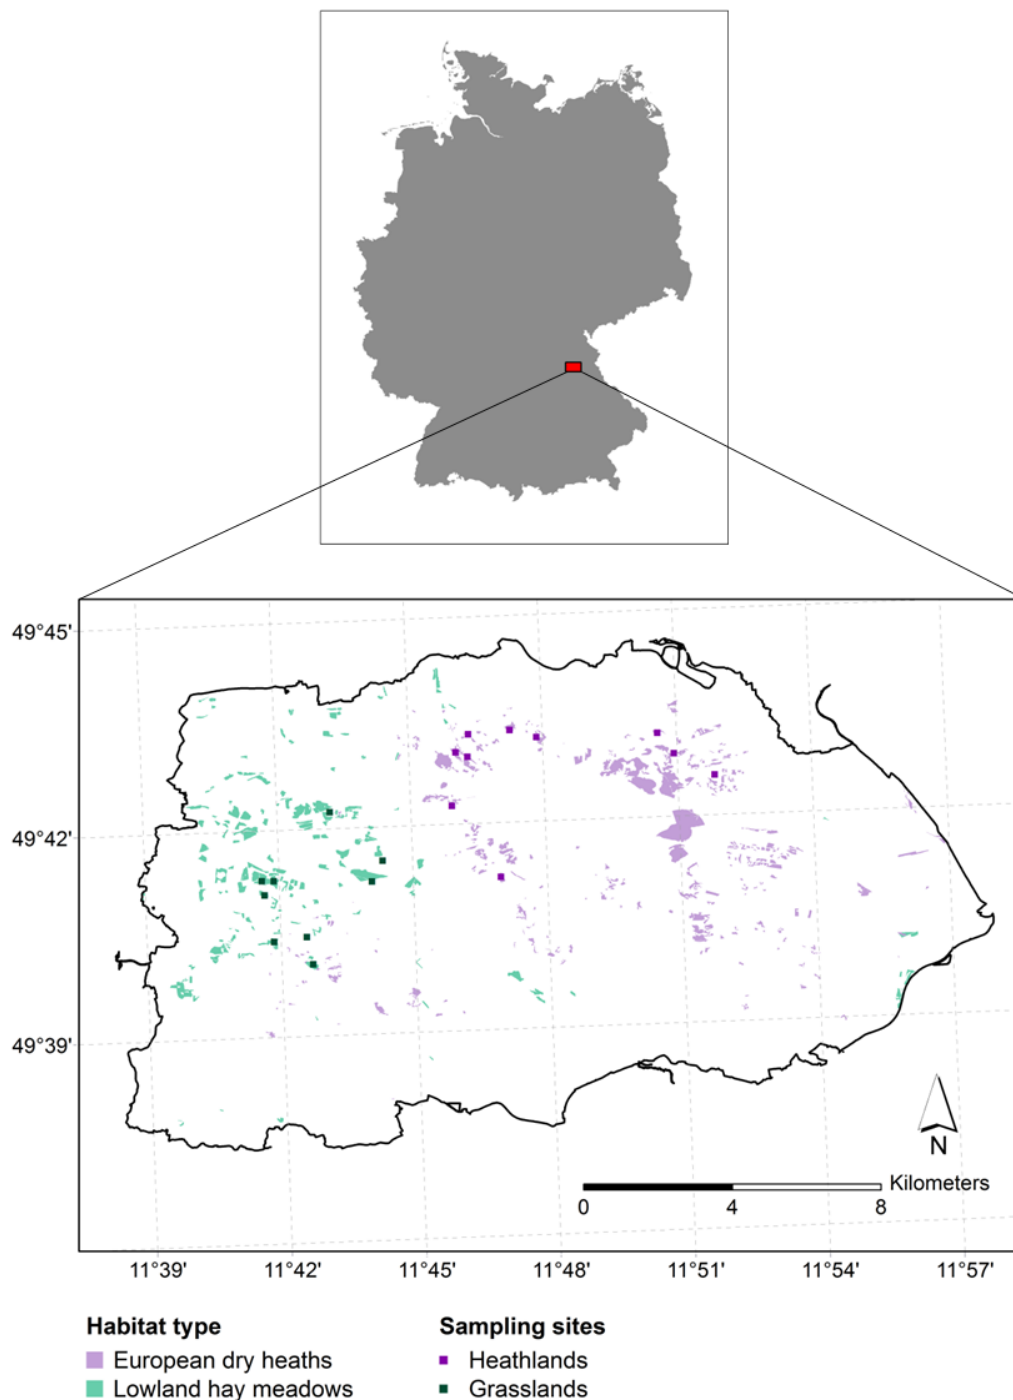

Figure S1. Location of the sampling sites in heathlands (10) and grasslands (nine) at Grafenwöhr military training area (GTA) in Bavaria, Germany. Each site comprised four plots in heathlands and six plots in grasslands, respectively. Shaded areas indicate the occurrence of the Natura 2000 habitat types 4030, European dry heaths, and 6510, lowland hay meadows according to the draft of the Natura 2000 management plan (2013/2014) for the Site of Community Importance and Special Area of Conservation US-Truppenübungsplatz Grafenwöhr (DE6336301).

## Appendix S1: Floristic details to the NMDS results

The two-dimensional NMDS analysis of species biomass percentages per plot reached a solution with stress of 0.19 for heathlands (linear fit  $R^2 = 0.83$ , non-metric fit  $R^2 = 0.96$ ) and 0.20 for grasslands (linear fit  $R^2 = 0.80$ , non-metric fit  $R^2 = 0.95$ ). In most cases, sampling sites were well separated from each other representing the spatial nestedness of the data (Figure S2(a) and (c)). The first axis (which was forced to parallel the pH gradient constituted by heathland or grassland plots, respectively) captured the largest spread of plots in the ordination space. The arrangement of species' optima in both heathlands and grasslands reflects this gradient (Figure S2(b) and (d)).

In accordance with the trends in soil chemical parameters (cf. Figure 1 in the main text) the NMDS ordinations allowed to delineate subunits of heathland and grassland plant communities. In heathlands, typical species of the *Vaccinio-Callunetum* Büker 1941 association, such as *Calluna vulgaris* and *Vaccinium* spp., occupy the left part of the ordination space. Moving towards the centre, there are species associated with the alliance *Violion caninae* Schwickerath 1944, e.g. *Potentilla erecta*, *Nardus stricta* and *Arnica montana*. Species related to mesotrophic grassland communities, e.g. *Leucanthemum ircutianum*, gather on the right side of the ordination space. In the ordination of grasslands, species indicating nutrient scarcity scatter from the left to the upper right side of the ordination space. While the left is governed by species indicative of nutrient-poor siliceous grasslands (*Polygalo-Nardetum* Oberd. 1957), such as *Viola canina*, more and more representatives of calcicolous grassland communities, e.g. *Brachypodium pinnatum*, appear on the right side of the ordination space. Species typical of mesotrophic grassland communities occupy the centre of the ordination space and a conspicuous cluster of ruderal plants, e.g. *Aphanes arvensis*, is located at the bottom.

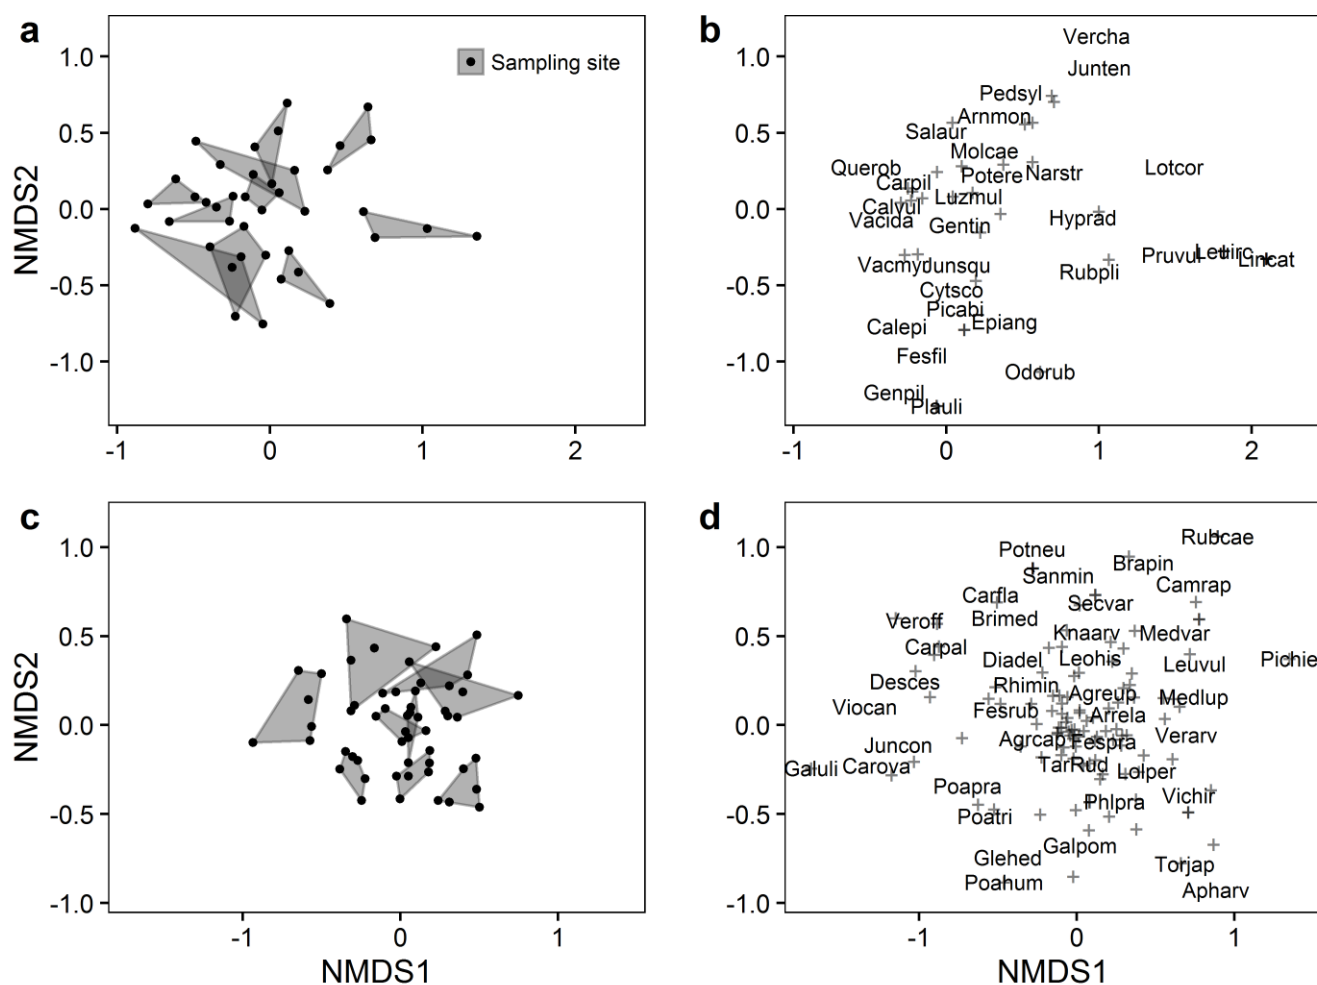

Figure S2: NMDS ordination of vascular plant species composition of (a) 40 plots surveyed in heathlands and (c) 54 plots surveyed in grasslands. Sampling sites are visualised by shaded hulls. The first NMDS axis parallels the soil pH gradient of plots. Individual species scores for (b) heathlands and (d) grasslands are shown in the same ordination space. The name of the species with the higher abundance was printed (30 species in heathlands, 40 species in grasslands) if species' name tags overlapped; remaining species are represented by '+'. See Table S3 for abbreviations of species names.

Table S1: Information on selected studies and their results reported on the relationship between plant species richness (SR) and extractable soil phosphorus (P).  $n$  is the number of vegetation plots examined. For the studies that used a different P extraction method than CAL, the approximate CAL-P range ( $\text{mg kg}^{-1}$ ) was roughly estimated by  $\text{CAL-P} = \text{Olsen-P} * 1.45$  (Barberis et al. 1995; Wuenscher et al. 2015) and  $\text{Olsen-P} = \text{EDTA-P} * 1.55$  (Gilbert et al. 2009). P concentrations referring to soil volume ( $\text{mg l}^{-1}$ ) were converted to the unit  $\text{g kg}^{-1}$  assuming a soil bulk density of  $1.4 \text{ g cm}^{-3}$ ). Approximate CAL-P values for critical soil P concentrations derived from the literature are given in parentheses.

| Study                 | Location                                        | Vegetation units                                                                                                                           | Fertilisation               | Management                                             | Plot size       | $n$ | P extraction method | Soil P range                         | Approximate CAL-P range ( $\text{mg kg}^{-1}$ ) | Critical soil P concentrations                                                                                          | Shape of SR ~ P relationship |
|-----------------------|-------------------------------------------------|--------------------------------------------------------------------------------------------------------------------------------------------|-----------------------------|--------------------------------------------------------|-----------------|-----|---------------------|--------------------------------------|-------------------------------------------------|-------------------------------------------------------------------------------------------------------------------------|------------------------------|
| Ceulemans et al. 2013 | North-western Europe (GB, FR, BE)               | <i>Violion caninae</i> alliance                                                                                                            | none                        | extensive management by cutting or cutting and grazing | $4 \text{ m}^2$ | 132 | Olsen               | $0.4\text{-}86.1 \text{ mg kg}^{-1}$ | 0.6-24.9                                        | < 20 species per $4 \text{ m}^2$ for Olsen-P > $20 \text{ mg kg}^{-1}$ (29 $\text{mg CAL-P kg}^{-1}$ )                  | negative exponential         |
| Ceulemans et al. 2014 | Europe (IE, IM, GB, FR, BE, NL, DE, NO, DK, SE) | <i>Nardus</i> grasslands (Habitat type 6230), lowland hay meadows (Habitat type 6510), calcareous grasslands (Habitat types 6210 and 2130) | none                        | extensive management by cutting or cutting and grazing | $4 \text{ m}^2$ | 501 | Olsen               | $0\text{-}305.5 \text{ mg kg}^{-1}$  | 0-442.9                                         | SR at a constant low level where Olsen-P > $104\text{-}130 \text{ mg kg}^{-1}$ (150.8-188.5 $\text{mg CAL-P kg}^{-1}$ ) | negative log-linear          |
| Critchley et al. 2002 | GB (14 environmentally sensitive areas)         | 38 plant communities within seven main vegetation types (calcareous, mesotrophic and acidic grasslands,                                    | in most cases low or absent | primarily grazing                                      | $1 \text{ m}^2$ | 569 | Olsen               | $1.3\text{-}82.2 \text{ mg l}^{-1}$  | 2.7-166.9                                       | highest SR at $4\text{-}15 \text{ mg Olsen-P l}^{-1}$ (8.1-30.5 $\text{mg CAL-P kg}^{-1}$ )                             | humped-back                  |

Table S1. Continued

| Study                | Location                                        | Vegetation units                                                                                                                                                                                               | Fertilisation                                                                      | Management                                                | Plot size                | <i>n</i> | P extraction method       | Soil P range                  | Approximate CAL-P range (mg kg <sup>-1</sup> ) | Critical soil P concentrations                                                                                                                                                                            | Shape of SR ~ P relationship |
|----------------------|-------------------------------------------------|----------------------------------------------------------------------------------------------------------------------------------------------------------------------------------------------------------------|------------------------------------------------------------------------------------|-----------------------------------------------------------|--------------------------|----------|---------------------------|-------------------------------|------------------------------------------------|-----------------------------------------------------------------------------------------------------------------------------------------------------------------------------------------------------------|------------------------------|
|                      |                                                 | mires, heaths, swamps, underscrub)                                                                                                                                                                             |                                                                                    |                                                           |                          |          |                           |                               |                                                |                                                                                                                                                                                                           |                              |
| Gilbert et al. 2009  | GB (11 lowland grassland sites)                 | neutral lowland grasslands ( <i>Trisetum-Polygonum</i> , <i>Alopecurion</i> , <i>Centaureo-Cynosuretum</i> , <i>Lolium-Cynosuretum</i> , <i>Lolium-Plantaginum</i> , <i>Calthion</i> , <i>Elymo-Rumicium</i> ) | no fertilization during previous decade                                            | different intensities of grazing or cutting               | 1 m <sup>2</sup>         | 176      | Olsen                     | 0.1-37.5 mg kg <sup>-1</sup>  | 0.2-54.3                                       | declining SR for increasing Olsen-P > 5 mg kg <sup>-1</sup> (7.3 mg CAL-P kg <sup>-1</sup> )                                                                                                              | humped-back                  |
| Hejcman et al. 2010  | DE (Rengen Grassland Experiment)                | <i>Nardus</i> grasslands ( <i>Violion caninae</i> , <i>Polygonum-Trisetum</i> , <i>Arrhenatherion</i> )                                                                                                        | five treatments (Ca, CaN, CaNP, CaNP-KCl and CaNP-K <sub>2</sub> SO <sub>4</sub> ) | 2 cuts y <sup>-1</sup>                                    | 0.02-5.76 m <sup>2</sup> | 30       | CAL                       | 4.8-425.9 mg kg <sup>-1</sup> | 4.8-425.9                                      | no species indicative of extensive grasslands, where Olsen-P > 20 mg kg <sup>-1</sup>                                                                                                                     | negative linear              |
| Janssens et al. 1998 | Western and Central Europe (BE, NL, GB, ES, LU) | old permanent grasslands with different soils and management                                                                                                                                                   | not specified                                                                      | 1-2 cuts y <sup>-1</sup> and autumn grazing in some cases | 100 m <sup>2</sup>       | 281      | acetate + EDTA extraction | 0.8-346.7 mg kg <sup>-1</sup> | 1.8-779.2                                      | < 20 species per 100 m <sup>2</sup> on soils with EDTA-P > 50 mg kg <sup>-1</sup> (112.4 mg CAL-P kg <sup>-1</sup> ); maximum of species at 40 mg EDTA-P kg <sup>-1</sup> (58 mg CAL-P kg <sup>-1</sup> ) | humped-back                  |

Table S1. Continued

| Study              | Location           | Vegetation units                                                                                                                                                                                                                                                | Fertilisation                               | Management               | Plot size          | <i>n</i> | P extraction method | Soil P range                 | Approximate CAL-P range (mg kg <sup>-1</sup> ) | Critical soil P concentrations                                                                                                                        | Shape of SR ~ P relationship |
|--------------------|--------------------|-----------------------------------------------------------------------------------------------------------------------------------------------------------------------------------------------------------------------------------------------------------------|---------------------------------------------|--------------------------|--------------------|----------|---------------------|------------------------------|------------------------------------------------|-------------------------------------------------------------------------------------------------------------------------------------------------------|------------------------------|
| Marini et al. 2007 | IT (Southern Alps) | lowland moderate and high intensive meadows ( <i>Pastinaco-Arrhenatheretum</i> , <i>Ranunculo repentis-Alopecuretum pratensis</i> ), mountain intensive meadows ( <i>Trisetetum flavescens</i> ), semi-natural low productive meadows ( <i>Bromion erecti</i> ) | 0-350 kg N ha <sup>-1</sup> y <sup>-1</sup> | 1-4 cuts y <sup>-1</sup> | 100 m <sup>2</sup> | 56       | Olsen               | 5.7-67.6 mg kg <sup>-1</sup> | 8.2-98.1                                       | conservation and restoration of species-rich hay meadows requires low-level soil Olsen-P < 26.2 mg kg <sup>-1</sup> (38.0 mg CAL-P kg <sup>-1</sup> ) | negative log-linear          |

## References (Table S1)

- Barberis E, Marsan FA, Scalenghe R, Lammers A, Schwertmann U, Edwards AC, Maguire R, Wilson MJ, Delgado A, Torrent J. 1995. European soils overfertilized with phosphorus: Part 1. Basic properties. *Fertilizer Research* 45:199–207.
- Ceulemans T, Merckx R, Hens M, Honnay O. 2013. Plant species loss from European semi-natural grasslands following nutrient enrichment – is it nitrogen or is it phosphorus? *Global Ecology and Biogeography* 22:73–82.
- Ceulemans T, Stevens CJ, Duchateau L, Jacquemyn H, Gowing DJG, Merckx R, Wallace H, van Rooijen N, Goethem T, Bobbink R, et al. 2014. Soil phosphorus constrains biodiversity across European grasslands. *Global Change Biology* 20:3814–3822.
- Critchley CNR, Chambers BJ, Fowbert JA, Bhogal A, Rose SC, Sanderson RA. 2002. Plant species richness, functional type and soil properties of grasslands and allied vegetation in English Environmentally Sensitive Areas. *Grass and Forage Science* 57:82–92.
- Gilbert J, Gowing D, Wallace H. 2009. Available soil phosphorus in semi-natural grasslands: assessment methods and community tolerances. *Biological Conservation* 142:1074–1083.
- Hejzman M, Češková M, Schellberg J, Pätzold S. 2010. The Rengen Grassland Experiment: Effect of Soil Chemical Properties on Biomass Production, Plant Species Composition and Species Richness. *Folia Geobotanica* 45:125–142.
- Janssens F, Peeters A, Tallowin JRB, Bakker JP, Bekker RM, Fillat F, Oomes MJM. 1998. Relationship between soil chemical factors and grassland diversity. *Plant and Soil* 202:69–78.
- Marini L, Scotton M, Klimek S, Isselstein J, Pecile A. 2007. Effects of local factors on plant species richness and composition of Alpine meadows. *Agriculture, Ecosystems & Environment* 119:281–288.
- Wuenschel R, Unterfrauner H, Peticza R, Zeheneter F. 2015. A comparison of 14 soil phosphorus extraction methods applied to 50 agricultural soils from Central Europe. *Plant, Soil and Environment* 61:86–96.



Table S2: Composition of seed mixtures designed for sands (heathlands) and calcareous loamy sands (grasslands) used for occasional reseeding on Grafenwöhr military training area.

| Functional group | Heathlands                  |              | Grasslands                  |              |
|------------------|-----------------------------|--------------|-----------------------------|--------------|
|                  | Species                     | Mass percent | Species                     | Mass percent |
| Forbs            | <i>Achillea millefolium</i> | 2.5%         | <i>Achillea millefolium</i> | 4%           |
|                  | <i>Daucus carota</i>        | 2%           | <i>Agrimonia eupatoria</i>  | 1%           |
|                  | <i>Hypericum</i>            | 0.5%         | <i>Cichorium intybus</i>    | 4%           |
|                  | <i>Plantago lanceolata</i>  | 2%           | <i>Galium verum</i>         | 2%           |
|                  | <i>Plantago major</i>       | 1%           | <i>Pimpinella major</i>     | 1%           |
|                  | <i>Taraxacum officinale</i> | 2%           | <i>Plantago lanceolata</i>  | 5%           |
|                  |                             |              | <i>Polygonum aviculare</i>  | 3%           |
| Legumes          | <i>Medicago lupulina</i>    | 10%          | <i>Lotus corniculatus</i>   | 5%           |
|                  | <i>Trifolium repens</i>     | 20%          | <i>Medicago lupulina</i>    | 5%           |
|                  |                             |              | <i>Trifolium repens</i>     | 5%           |
| Grasses          | <i>Agrostis capillaris</i>  | 5%           | <i>Bromus erectus</i>       | 15%          |
|                  | <i>Agrostis stolonifera</i> | 5%           | <i>Dactylis glomerata</i>   | 20%          |
|                  | <i>Dactylis glomerata</i>   | 20%          | <i>Festuca rubra</i>        | 20%          |
|                  | <i>Festuca rubra</i>        | 15%          | <i>Phleum pratense</i>      | 5%           |
|                  | <i>Festuca ovina</i>        | 15%          | <i>Trisetum flavescens</i>  | 5%           |

Table S3. List of vascular plant species found on 40 and 54 plots of 25 m<sup>2</sup> in heathlands and grasslands (abbreviations of species names or symbol ‘+’ relate to the representation in Figure S2(b) and (d)) on Grafenwoehr military training area in Bavaria, Germany. Functional strategy refers to Grime (1979): ‘C’ – competitive strategy, ‘S’ – stress-tolerant strategy, ‘R’ – ruderal strategy (according to Hunt et al. (2004); [cited 2016 Feb 05]; Available from: [http://people.exeter.ac.uk/rh203/csr\\_signature.html](http://people.exeter.ac.uk/rh203/csr_signature.html)). E<sub>F</sub>, E<sub>R</sub>, and E<sub>N</sub> are Ellenberg indicator values for soil moisture, soil reaction and nutrient availability, respectively (Ellenberg & Leuschner 2010); ‘x’ – indifferent behaviour, ‘~’ – fluctuating water table, ‘=’ – indicator of inundated soils. ‘NA’ denotes missing information.

| Species                                         | Heathlands | Grasslands | Functional strategy | E <sub>F</sub> | E <sub>R</sub> | E <sub>N</sub> |
|-------------------------------------------------|------------|------------|---------------------|----------------|----------------|----------------|
| <i>Achillea millefolium</i>                     | +          | +          | CR/CSR              | 4              | x              | 5              |
| <i>Achillea ptarmica</i>                        |            | +          | CR/CSR              | 8              | 4              | 2              |
| <i>Agrimonia eupatoria</i>                      |            | Agreup     | CSR                 | 4              | 8              | 4              |
| <i>Agrostis capillaris</i>                      | +          | Agrcap     | CSR                 | x              | 4              | 4              |
| <i>Alchemilla glaucescens</i>                   |            | +          | CSR                 | 5              | 4              | 3              |
| <i>Alchemilla monticola</i>                     |            | +          | CSR                 | 5              | 6              | 4              |
| <i>Alchemilla</i> sp.                           |            | +          | NA                  | NA             | NA             | NA             |
| <i>Alchemilla subcrenata</i>                    |            | +          | CSR                 | 5              | 5              | 6              |
| <i>Alchemilla vulgaris</i>                      |            | +          | S/CSR               | 5              | 6              | 6              |
| <i>Alchemilla xanthochlora</i>                  |            | +          | CSR                 | 7              | 7              | ?              |
| <i>Allium vineale</i>                           |            | +          | S/CSR               | 4              | x              | 7              |
| <i>Alopecurus pratensis</i>                     |            | +          | C/CSR               | 6              | 6              | 7              |
| <i>Anthoxanthum odoratum</i>                    | +          | +          | SR/CSR              | x              | 5              | x              |
| <i>Anthriscus sylvestris</i>                    |            | +          | CR                  | 5              | x              | 8              |
| <i>Aphanes arvensis</i>                         |            | Apharv     | R/SR                | 6              | x              | 5              |
| <i>Arenaria serpyllifolia</i>                   |            | +          | SR                  | 4              | 7              | x              |
| <i>Arnica montana</i>                           | Arnmon     |            | CSR                 | 5              | 3              | 2              |
| <i>Arrhenatherum elatius</i>                    |            | Arrela     | C/CSR               | x              | 7              | 7              |
| <i>Bellis perennis</i>                          |            | +          | R/CSR               | 5              | x              | 6              |
| <i>Betonica officinalis</i>                     |            | +          | S                   | x~             | x              | 3              |
| <i>Betula pendula</i>                           | +          |            | C/SC                | x              | x              | x              |
| <i>Brachypodium pinnatum</i>                    |            | Brapin     | SC                  | 4              | 7              | 4              |
| <i>Briza media</i>                              |            | Brimed     | S                   | x              | x              | 2              |
| <i>Bromus hordeaceus</i> ssp. <i>hordeaceus</i> |            | +          | R/CR                | x~             | x              | 3              |

Table S3. Continued

| Species                        | Heathlands | Grasslands | Functional strategy | E <sub>F</sub> | E <sub>R</sub> | E <sub>N</sub> |
|--------------------------------|------------|------------|---------------------|----------------|----------------|----------------|
| <i>Bromus sterilis</i>         |            | +          | R/CR                | 4              | x              | 5              |
| <i>Calamagrostis epigejos</i>  | Calepi     |            | C/SC                | x~             | x              | 6              |
| <i>Calluna vulgaris</i>        | Calvul     |            | SC                  | x              | 1              | 1              |
| <i>Campanula glomerata</i>     |            | +          | S                   | 4              | 7              | 3              |
| <i>Campanula patula</i>        |            | +          | CSR                 | 5              | 7              | 5              |
| <i>Campanula rapunculoides</i> |            | Camrap     | CR/CSR              | 4              | 7              | 4              |
| <i>Campanula rotundifolia</i>  | +          | +          | S                   | x              | x              | 2              |
| <i>Capsella bursa-pastoris</i> |            | +          | R                   | 5              | x              | 6              |
| <i>Cardamine pratensis</i>     |            | +          | R/CSR               | 6              | x              | x              |
| <i>Carex flacca</i>            |            | Carfla     | S                   | 6~             | 8              | 4              |
| <i>Carex hirta</i>             |            | +          | C/CSR               | 6~             | x              | 5              |
| <i>Carex leporina</i>          |            | Carova     | S/CSR               | 7~             | 3              | 3              |
| <i>Carex pallescens</i>        |            | Carpal     | S                   | 6~             | 4              | 3              |
| <i>Carex pilulifera</i>        | Carpil     |            | S                   | 5~             | 3              | 3              |
| <i>Carex spicata</i>           |            | +          | CSR                 | 4              | 6              | 4              |
| <i>Carlina vulgaris</i>        | +          |            | SR                  | 4              | 7              | 3              |
| <i>Carum carvi</i>             |            | +          | C                   | 5              | x              | 6              |
| <i>Centaurea jacea</i>         |            | +          | C                   | x              | x              | x              |
| <i>Centaurea scabiosa</i>      |            | +          | S/CSR               | 3              | 8              | 4              |
| <i>Centaureum erythraea</i>    |            | +          | SR                  | 5              | 6              | 6              |
| <i>Cerastium arvense</i>       |            | +          | SR/CSR              | 4              | 6              | 4              |
| <i>Cerastium holosteoides</i>  | +          | +          | R/CSR               | 5              | x              | 5              |
| <i>Cichorium intybus</i>       |            | +          | CSR                 | 4              | 8              | 5              |
| <i>Cirsium arvense</i>         |            | +          | C                   | x              | x              | 7              |
| <i>Cirsium vulgare</i>         |            | +          | CR                  | 5              | 7              | 8              |
| <i>Clinopodium vulgare</i>     |            | +          | S/CSR               | 4              | 7              | 3              |
| <i>Convolvulus arvensis</i>    |            | +          | CR                  | 4              | 7              | x              |
| <i>Crataegus monogyna</i>      |            | +          | SC                  | 4              | 8              | 4              |
| <i>Crataegus sp.</i>           | +          | +          | NA                  | NA             | NA             | NA             |
| <i>Crepis biennis</i>          |            | +          | R/CSR               | 6              | 6              | 5              |
| <i>Cruciata laevipes</i>       |            | +          | CSR                 | 6              | 6              | 7              |
| <i>Cynosurus cristatus</i>     |            | +          | CSR                 | 5              | x              | 4              |

Table S3. Continued

| Species                                            | Heathlands | Grasslands | Functional strategy | E <sub>F</sub> | E <sub>R</sub> | E <sub>N</sub> |
|----------------------------------------------------|------------|------------|---------------------|----------------|----------------|----------------|
| <i>Cytisus scoparius</i>                           | Cytsco     |            | SC                  | 4              | 3              | 4              |
| <i>Dactylis glomerata</i>                          |            | +          | C/CSR               | 5              | x              | 6              |
| <i>Danthonia decumbens</i>                         | +          |            | S                   | x              | 3              | 2              |
| <i>Daucus carota</i>                               |            | +          | SR/CSR              | 4              | x              | 4              |
| <i>Deschampsia cespitosa</i> ssp. <i>cespitosa</i> |            | Desces     | SR/CSR              | 7~             | x              | 3              |
| <i>Deschampsia flexuosa</i>                        | +          |            | S/SC                | x              | 2              | 3              |
| <i>Dianthus deltoides</i>                          |            | Diadel     | S/CSR               | 3              | 3              | 2              |
| <i>Elymus repens</i> ssp. <i>repens</i>            |            | +          | C/CR                | x~             | x              | 7              |
| <i>Epilobium angustifolium</i>                     | Epiang     |            | C                   | 5              | 5              | 8              |
| <i>Equisetum arvense</i>                           |            | +          | CR                  | x~             | x              | 3              |
| <i>Erigeron acris</i> ssp. <i>acris</i>            | +          |            | SR                  | 4              | 8              | 2              |
| <i>Euphorbia cyparissias</i>                       |            | +          | CSR                 | 3              | x              | 3              |
| <i>Euphrasia micrantha</i>                         | +          |            | R                   | 5              | 2              | 1              |
| <i>Festuca filiformis</i>                          | Fesfil     |            | SC                  | 4              | 3              | 2              |
| <i>Festuca ovina</i>                               | +          |            | S                   | x              | 3              | 1              |
| <i>Festuca pratensis</i>                           |            | Fespra     | CSR                 | 6              | x              | 6              |
| <i>Festuca rubra</i> ssp. <i>rubra</i>             |            | Fesrub     | CSR                 | 6              | 6              | x              |
| <i>Fragaria vesca</i>                              |            | +          | CSR                 | 5              | x              | 6              |
| <i>Fragaria viridis</i>                            |            | +          | CSR                 | 3              | 8              | 3              |
| <i>Galium album</i>                                |            | +          | C/CSR               | 5              | 7              | 5              |
| <i>Galium pumilum</i>                              |            | +          | CSR                 | 4~             | 4              | 2              |
| <i>Galium uliginosum</i>                           |            | Galuli     | S/CSR               | 8~             | x              | 2              |
| <i>Galium verum</i>                                | +          | +          | SC/CSR              | 4~             | 7              | 3              |
| <i>Galium x pommeranicum</i>                       |            | Galpom     | NA                  | NA             | NA             | NA             |
| <i>Genista pilosa</i>                              | Genpil     |            | SC                  | x              | 2              | 1              |
| <i>Genista tinctoria</i>                           | Gentin     |            | SC                  | 6~             | 6              | 1              |
| <i>Geranium columbinum</i>                         |            | +          | SR                  | 4              | 7              | 7              |
| <i>Geranium dissectum</i>                          |            | +          | R/SR                | 5              | 8              | 5              |
| <i>Geum urbanum</i>                                |            | +          | S/CSR               | 5              | x              | 7              |
| <i>Glechoma hederacea</i>                          |            | Glehed     | CSR                 | 6              | x              | 7              |
| <i>Helictotrichon pubescens</i>                    |            | +          | S/CSR               | 3              | x              | 4              |
| <i>Heracleum sphondylium</i>                       |            | +          | CR                  | 5              | x              | 8              |

Table S3. Continued

| Species                                        | Heathlands | Grasslands | Functional strategy | E <sub>F</sub> | E <sub>R</sub> | E <sub>N</sub> |
|------------------------------------------------|------------|------------|---------------------|----------------|----------------|----------------|
| <i>Hieracium lachenalii</i>                    | +          |            | S/CSR               | 4              | 4              | 2              |
| <i>Hieracium pilosella</i>                     | +          |            | S/CSR               | 4              | x              | 2              |
| <i>Hieracium sabaudum</i>                      | +          |            | S/CSR               | 4              | 4              | 2              |
| <i>Hieracium</i> sp.                           | +          |            | S/CSR               | NA             | NA             | NA             |
| <i>Hieracium umbellatum</i>                    |            | +          | S/CSR               | 4              | 4              | 2              |
| <i>Holcus lanatus</i>                          | +          | +          | CSR                 | 6              | x              | 5              |
| <i>Hypericum maculatum</i> agg.                |            | +          | CR/CSR              | 6~             | 3              | 2              |
| <i>Hypericum perforatum</i>                    | +          | +          | CR/CSR              | 4              | 6              | 4              |
| <i>Hypochaeris radicata</i>                    | Hyprad     | +          | CSR                 | 5              | 4              | 3              |
| <i>Juncus conglomeratus</i>                    | +          | Juncon     | C/SC                | 7~             | 4              | 3              |
| <i>Juncus squarrosus</i>                       | Junsqu     |            | S/SC                | 7~             | 1              | 1              |
| <i>Juncus tenuis</i>                           | Junten     | +          | CSR                 | 6              | 5              | 5              |
| <i>Knautia arvensis</i>                        |            | Knaarv     | CSR                 | 4              | x              | 4              |
| <i>Lathyrus pratensis</i>                      |            | +          | CSR                 | 6              | 7              | 6              |
| <i>Leontodon hispidus</i> ssp. <i>hispidus</i> |            | Leohis     | S/CSR               | 5              | 7              | 6              |
| <i>Leontodon saxatile</i>                      | +          |            | SR/CSR              | 6~             | 6              | 5              |
| <i>Leontodon</i> sp.                           | +          |            | NA                  | NA             | NA             | NA             |
| <i>Leucanthemum ircutianum</i>                 | Leuirc     | +          | C                   | 4              | x              | 3              |
| <i>Leucanthemum vulgare</i>                    |            | Leuvul     | C/CSR               | 4              | x              | 3              |
| <i>Linum catharticum</i>                       | Lincat     |            | SR                  | x              | 7              | 2              |
| <i>Lolium perenne</i>                          |            | Lolper     | CR/CSR              | 5              | 7              | 7              |
| <i>Lotus corniculatus</i>                      | Lotcor     | +          | S/CSR               | 4              | 7              | 3              |
| <i>Luzula campestris</i>                       | +          | +          | S/CSR               | 4              | 3              | 3              |
| <i>Luzula multiflora</i>                       | Luzmul     |            | S                   | 5~             | 5              | 3              |
| <i>Lychnis flos-cuculi</i>                     |            | +          | CSR                 | 7~             | x              | x              |
| <i>Medicago falcata/varia</i>                  |            | Medvar     | C/CSR               | 3              | 9              | 3              |
| <i>Medicago lupulina</i>                       |            | Medlup     | R/SR                | 4              | 8              | x              |
| <i>Melampyrum pratense</i>                     | +          |            | SR                  | 5              | 3              | 2              |
| <i>Melampyrum sylvaticum</i>                   | +          |            | CR                  | 5              | 2              | 2              |
| <i>Mentha arvensis</i>                         |            | +          | CR                  | 7~             | x              | x              |
| <i>Molinia caerulea</i>                        | Molcae     |            | SC                  | 7              | x              | 2              |
| <i>Nardus stricta</i>                          | Narstr     |            | S                   | x~             | 2              | 2              |

Table S3. Continued

| Species                                        | Heathlands | Grasslands | Functional strategy | E <sub>F</sub> | E <sub>R</sub> | E <sub>N</sub> |
|------------------------------------------------|------------|------------|---------------------|----------------|----------------|----------------|
| <i>Odontites rubra</i>                         | Odorub     | +          | R                   | 5~             | 7              | 5              |
| <i>Ononis</i> sp.                              |            | +          | NA                  | NA             | NA             | NA             |
| <i>Pedicularis sylvatica</i>                   | Pedsyl     |            | SR                  | 8~             | 1              | 2              |
| <i>Phleum pratense</i>                         |            | Phlpra     | CSR                 | 5              | x              | 7              |
| <i>Picea abies</i>                             | Picabi     |            | C                   | x              | x              | x              |
| <i>Picris hieracioides</i>                     |            | Pichie     | R/CSR               | 4              | 8              | 4              |
| <i>Pimpinella major</i>                        |            | +          | CSR                 | 5              | 7              | 6              |
| <i>Pimpinella saxifraga</i>                    |            | +          | S/SR                | 3              | x              | 2              |
| <i>Pinus sylvestris</i> ssp. <i>sylvestris</i> | +          |            | C                   | x              | x              | x              |
| <i>Plantago lanceolata</i>                     |            | +          | CSR                 | x              | x              | x              |
| <i>Plantago major</i>                          |            | +          | R/CSR               | 5              | x              | 6              |
| <i>Plantago media</i>                          |            | +          | S/CSR               | 4              | 7              | 3              |
| <i>Plantago uliginosa</i>                      | Plauli     |            | R                   | 7=             | 5              | 4              |
| <i>Poa angustifolia</i>                        |            | +          | S/CSR               | x              | x              | 3              |
| <i>Poa humilis</i>                             |            | Poahum     | C                   | 5              | 6              | 3              |
| <i>Poa pratensis</i>                           |            | Poapra     | CSR                 | 5              | x              | 6              |
| <i>Poa trivialis</i>                           |            | Poatri     | CR/CSR              | 7              | x              | 7              |
| <i>Polygala serpyllifolia</i>                  | +          |            | S                   | 6              | 2              | 2              |
| <i>Polygala vulgaris</i>                       |            | +          | S                   | 4              | 3              | 2              |
| <i>Populus tremula</i>                         | +          | +          | SC                  | 5              | x              | x              |
| <i>Potentilla anserina</i>                     |            | +          | CR/CSR              | 6~             | x              | 7              |
| <i>Potentilla argentea</i>                     |            | +          | S/CSR               | 2              | 3              | 1              |
| <i>Potentilla erecta</i>                       | Potere     |            | S/CSR               | x              | x              | 2              |
| <i>Potentilla neummanniana</i>                 |            | Potneu     | S                   | 3              | 7              | 2              |
| <i>Potentilla recta</i>                        |            | +          | CSR                 | 3              | 5              | 2              |
| <i>Potentilla reptans</i>                      |            | +          | CR/CSR              | 6              | 7              | 5              |
| <i>Primula veris</i>                           |            | +          | S/CSR               | 4              | 8              | 3              |
| <i>Prunella vulgaris</i>                       | Pruvul     | +          | CSR                 | 5              | 7              | x              |
| <i>Prunus spinosa</i>                          |            | +          | SC                  | 4              | 7              | x              |
| <i>Pteridium aquilinum</i>                     | +          |            | C                   | 5~             | 3              | 3              |
| <i>Pyrus communis</i>                          |            | +          | C                   | 5              | 8              | x              |
| <i>Quercus robur</i>                           | Querob     |            | SC                  | x              | x              | x              |

Table S3. Continued

| Species                                   | Heathlands | Grasslands | Functional strategy | E <sub>F</sub> | E <sub>R</sub> | E <sub>N</sub> |
|-------------------------------------------|------------|------------|---------------------|----------------|----------------|----------------|
| <i>Ranunculus acris</i> ssp. <i>acris</i> |            | +          | CSR                 | 6              | x              | x              |
| <i>Ranunculus bulbosus</i>                |            | +          | SR                  | 3              | 7              | 3              |
| <i>Ranunculus repens</i>                  |            | +          | CR                  | 7~             | x              | 7              |
| <i>Rhinanthus minor</i>                   |            | Rhimin     | R/SR                | 4              | x              | 3              |
| <i>Rubus caesius</i>                      |            | Rubcae     | SC                  | x              | 8              | 7              |
| <i>Rubus plicatus</i>                     | Rubpli     |            | C                   | 5              | 2              | 3              |
| <i>Rumex acetosa</i>                      |            | +          | CSR                 | x              | x              | 6              |
| <i>Rumex acetosella</i>                   | +          |            | SR/CSR              | 3              | 2              | 2              |
| <i>Rumex crispus</i>                      |            | +          | R/CR                | x              | x              | 6              |
| <i>Salix aurita</i>                       | Salaur     |            | C                   | 8~             | 4              | 3              |
| <i>Salix caprea</i>                       | +          |            | C                   | 6              | 7              | 7              |
| <i>Sanguisorba minor</i>                  |            | Sanmin     | S                   | 3              | 8              | 2              |
| <i>Saxifraga granulata</i>                |            | +          | SR/CSR              | 4              | 5              | 3              |
| <i>Scorzoneroide autumnalis</i>           |            | +          | R/CSR               | 5              | 5              | 5              |
| <i>Securigera varia</i>                   |            | Secvar     | C/CSR               | 4              | 9              | 3              |
| <i>Senecio jacobaea</i>                   |            | +          | R/CR                | 4~             | 7              | 5              |
| <i>Silaum silaus</i>                      |            | +          | S/CSR               | x~             | 7              | 3              |
| <i>Silene vulgaris</i>                    |            | +          | CSR                 | 4~             | 7              | 4              |
| <i>Silenoideae</i> sp.                    |            | +          | NA                  | NA             | NA             | NA             |
| <i>Stellaria graminea</i>                 |            | +          | CSR                 | 5              | 4              | 3              |
| <i>Taraxacum</i> Sect. <i>Ruderalia</i>   |            | TarRud     | R/CSR               | 5              | x              | 8              |
| <i>Thymus pulegioides</i>                 |            | +          | CSR                 | 4              | x              | 1              |
| <i>Torilis japonica</i>                   |            | Torjap     | SR/CSR              | 5              | 8              | 8              |
| <i>Tragopogon pratense</i>                |            | +          | CR/CSR              | 4              | 7              | 6              |
| <i>Trifolium campestre</i>                |            | +          | SR                  | 4              | 6              | 3              |
| <i>Trifolium dubium</i>                   |            | +          | R/SR                | 4              | 6              | 4              |
| <i>Trifolium medium</i>                   | +          | +          | SC/CSR              | 4              | 6              | 3              |
| <i>Trifolium pratense</i>                 |            | +          | CSR                 | 5              | x              | x              |
| <i>Trifolium repens</i>                   |            | +          | CR/CSR              | 5              | 6              | 6              |
| <i>Trisetum flavescens</i>                |            | +          | CSR                 | x              | x              | 5              |
| <i>Vaccinium myrtillus</i>                | Vacmyr     |            | SC                  | x              | 2              | 3              |
| <i>Vaccinium uliginosum</i>               | +          |            | SC                  | x              | 1              | 3              |

Table S3. Continued

| Species                       | Heathlands | Grasslands | Functional strategy | E <sub>F</sub> | E <sub>R</sub> | E <sub>N</sub> |
|-------------------------------|------------|------------|---------------------|----------------|----------------|----------------|
| <i>Vaccinium vitis-idaea</i>  | Vacida     |            | S/SC                | 4~             | 2              | 1              |
| <i>Veronica arvensis</i>      |            | Verarv     | SR                  | x              | 6              | x              |
| <i>Veronica chamaedrys</i>    | Vercha     | +          | CSR                 | 5              | x              | x              |
| <i>Veronica officinalis</i>   | +          | Veroff     | S/CSR               | 4              | 3              | 4              |
| <i>Veronica serpyllifolia</i> |            | +          | R/CSR               | 5              | 5              | 5              |
| <i>Vicia angustifolia</i>     |            | +          | R/CSR               | x              | x              | x              |
| <i>Vicia cracca</i>           |            | +          | C/CSR               | 6              | x              | x              |
| <i>Vicia hirsuta</i>          |            | Vichir     | R/CSR               | 4              | x              | 4              |
| <i>Vicia lathyroides</i>      |            | +          | SR                  | 2              | 3              | 2              |
| <i>Vicia sepium</i>           |            | +          | C/CSR               | 5              | 6              | 5              |
| <i>Vicia tetrasperma</i>      |            | +          | R/CR                | 5              | 5              | 5              |
| <i>Viola canina</i>           | +          | Viocan     | S                   | 4              | 3              | 2              |
| <i>Viola hirta</i>            |            | +          | S                   | 3              | 8              | 3              |

## References

Ellenberg H, Leuschner C. 2010. Vegetation Mitteleuropas mit den Alpen. Stuttgart, DE: UTB Ulmer.

Grime JP. 1979. Plant strategies and vegetation processes. Chichester, UK: Wiley.

Hunt R, Hodgson JG, Thompson K, Bungener P, Dunnett NP, Askew AP. 2004. A new practical tool for deriving a functional signature for herbaceous vegetation. *Appl Veg Sci.* 7:163–170



Table S4. Summary statistics of plot characteristics (species richness, plant cover [%], herbaceous canopy height [cm], functional group ratio and biomass percentage weighted averages of Ellenberg indicator values and Grime strategy type components).

| Parameter      | Heathlands |            |             |            | Grasslands |            |             |            |
|----------------|------------|------------|-------------|------------|------------|------------|-------------|------------|
|                | <i>Min</i> | <i>Max</i> | <i>Mean</i> | <i>SEM</i> | <i>Min</i> | <i>Max</i> | <i>Mean</i> | <i>SEM</i> |
| SR             | 4.00       | 28.00      | 14.10       | 0.81       | 33.00      | 61.00      | 45.89       | 0.83       |
| cover          | 35.00      | 90.00      | 60.10       | 2.33       | 60.00      | 96.00      | 83.13       | 1.35       |
| canopy height  | 0.00       | 100.00     | 59.50       | 4.85       | 65.00      | 120.00     | 92.69       | 1.76       |
| FG ratio       | 0.00       | 0.82       | 0.12        | 0.03       | 1.00       | 9.00       | 3.46        | 0.30       |
| E <sub>F</sub> | 4.00       | 6.81       | 5.33        | 0.15       | 4.33       | 5.84       | 5.21        | 0.05       |
| E <sub>R</sub> | 1.00       | 1.51       | 1.16        | 0.02       | 5.14       | 7.19       | 6.09        | 0.07       |
| E <sub>N</sub> | 1.00       | 1.66       | 1.22        | 0.03       | 3.81       | 5.90       | 5.02        | 0.06       |
| C strategy     | 0.45       | 0.55       | 0.50        | 0.00       | 0.29       | 0.51       | 0.36        | 0.01       |
| S strategy     | 0.45       | 0.55       | 0.50        | 0.00       | 0.27       | 0.39       | 0.32        | 0.00       |
| R strategy     | 0.00       | 0.03       | 0.00        | 0.00       | 0.23       | 0.43       | 0.32        | 0.01       |

Table S5: Results of gradient analysis of linear and non-linear relationships between NMDS scores of heathland and grassland communities and plot characteristics including soil chemical parameters. Significance of linear relationships was tested by permutations ( $n = 10,000$ ) and significance of non-linear relationships was tested in generalised additive models.

| Parameter     | Linear response |                  | Non-linear response |                  |
|---------------|-----------------|------------------|---------------------|------------------|
|               | $R^2$           | $P^a$            | $P^a$               | $R^2$            |
| Heathlands    |                 |                  |                     |                  |
| pH            | 0.73            | <b>0.002</b>     | 0.86                | <b>&lt;0.001</b> |
| P             | 0.34            | 0.386            | 0.60                | 0.077            |
| K             | 0.15            | 0.764            | 0.61                | 0.392            |
| Mg            | 0.20            | 0.767            | 0.60                | 0.409            |
| SR            | 0.90            | <b>&lt;0.001</b> | 0.93                | <b>&lt;0.001</b> |
| cover         | 0.08            | 0.991            | 0.74                | 0.269            |
| canopy height | 0.36            | <b>0.022</b>     | 0.59                | <b>0.007</b>     |
| FG ratio      | 0.57            | <b>0.020</b>     | 0.89                | <b>&lt;0.001</b> |
| $E_F$         | 0.65            | 0.080            | 0.66                | <b>0.001</b>     |
| $E_R$         | 0.32            | 0.092            | 0.59                | <b>0.023</b>     |
| $E_N$         | 0.27            | 0.179            | 0.53                | <b>0.016</b>     |
| C strategy    | 0.06            | 0.666            | 0.36                | 0.675            |
| S strategy    | 0.02            | 0.850            | 0.12                | 0.970            |
| R strategy    | 0.32            | 0.279            | 0.55                | <b>&lt;0.001</b> |
| Grasslands    |                 |                  |                     |                  |
| pH            | 0.53            | <b>0.001</b>     | 0.52                | <b>&lt;0.001</b> |
| P             | 0.17            | 0.165            | 0.50                | 0.313            |
| K             | 0.07            | 0.467            | 0.38                | 0.055            |
| Mg            | 0.16            | <b>0.004</b>     | 0.79                | <b>0.013</b>     |
| SR            | 0.36            | <b>0.007</b>     | 0.41                | <b>&lt;0.001</b> |
| cover         | 0.45            | 0.050            | 0.63                | <b>0.002</b>     |
| canopy height | 0.42            | 0.221            | 0.55                | <b>0.015</b>     |
| FG ratio      | 0.04            | 0.439            | 0.51                | <b>&lt;0.001</b> |
| $E_F$         | 0.40            | <b>&lt;0.001</b> | 0.74                | <b>&lt;0.001</b> |
| $E_R$         | 0.58            | <b>&lt;0.001</b> | 0.62                | <b>&lt;0.001</b> |
| $E_N$         | 0.66            | <b>&lt;0.001</b> | 0.74                | <b>&lt;0.001</b> |
| C strategy    | 0.38            | 0.054            | 0.52                | <b>&lt;0.001</b> |
| S strategy    | 0.43            | <b>0.003</b>     | 0.60                | <b>0.001</b>     |
| R strategy    | 0.44            | <b>0.028</b>     | 0.67                | <b>0.028</b>     |

<sup>a</sup>Bold font indicates statistical significance ( $P < 0.05$ ).

Table S6: Overview of candidate linear mixed effects models (cumulative Akaike weight,  $\sum w_i \leq 0.95$ ) explaining species richness in heathlands and grasslands based on soil chemical parameters listing degrees of freedom ( $df$ ), log-likelihood (logLik), small sample size corrected Akaike information criterion (AICc), its difference to the best ranking model ( $\Delta AICc$ ), model weights ( $w_i$ ), which are standardised to sum to one, as well as marginal ( $R_{(m)}^2$ ) and conditional coefficient of determination ( $R_{(c)}^2$ ). Maximum likelihood estimation was used for AICc-based model comparison, but  $R_{(m)}^2$  and  $R_{(c)}^2$  were calculated under restricted maximum likelihood estimation.

| Model                                      | $df$ | logLik  | AICc   | $\Delta AICc$ | $w_i$ | $R_{(m)}^2$ | $R_{(c)}^2$ |
|--------------------------------------------|------|---------|--------|---------------|-------|-------------|-------------|
| Heathlands                                 |      |         |        |               |       |             |             |
| pH                                         | 4    | -101.26 | 215.49 | 0.00          | 0.16  | 0.54        | 0.70        |
| Mg + pH                                    | 5    | -99.39  | 216.51 | 1.02          | 0.10  | 0.55        | 0.70        |
| K <sup>2</sup> + pH                        | 5    | -99.16  | 217.15 | 1.66          | 0.07  | 0.55        | 0.68        |
| K + pH                                     | 5    | -99.65  | 217.29 | 1.80          | 0.07  | 0.53        | 0.72        |
| P <sup>2</sup> + pH                        | 5    | -100.04 | 217.66 | 2.18          | 0.05  | 0.55        | 0.70        |
| Mg <sup>2</sup> + pH                       | 5    | -99.92  | 218.09 | 2.60          | 0.04  | 0.54        | 0.70        |
| P + pH                                     | 5    | -100.04 | 218.14 | 2.65          | 0.04  | 0.53        | 0.70        |
| Mg + Mg <sup>2</sup> + pH                  | 6    | -97.56  | 218.54 | 3.06          | 0.04  | 0.54        | 0.71        |
| K <sup>2</sup> + Mg + pH                   | 6    | -97.40  | 218.57 | 3.08          | 0.03  | 0.55        | 0.69        |
| Mg + P <sup>2</sup> + pH                   | 6    | -98.13  | 218.69 | 3.20          | 0.03  | 0.56        | 0.70        |
| Mg + P + pH                                | 6    | -98.17  | 219.33 | 3.84          | 0.02  | 0.54        | 0.70        |
| K + Mg + pH                                | 6    | -97.94  | 219.37 | 3.88          | 0.02  | 0.54        | 0.70        |
| K <sup>2</sup> + P <sup>2</sup> + pH       | 6    | -97.93  | 219.49 | 4.00          | 0.02  | 0.56        | 0.68        |
| K + K <sup>2</sup> + pH                    | 6    | -97.71  | 219.52 | 4.03          | 0.02  | 0.53        | 0.70        |
| K <sup>2</sup> + Mg <sup>2</sup> + pH      | 6    | -97.51  | 219.54 | 4.05          | 0.02  | 0.54        | 0.68        |
| K <sup>2</sup> + Mg + Mg <sup>2</sup> + pH | 7    | -94.91  | 219.54 | 4.05          | 0.02  | 0.55        | 0.69        |
| K + Mg <sup>2</sup> + pH                   | 6    | -98.17  | 219.85 | 4.37          | 0.02  | 0.51        | 0.73        |

Table S6.Continued

| Model                                                       | $df$ | logLik | AICc   | $\Delta AICc$ | $w_i$ | $R_{(m)}^2$ | $R_{(c)}^2$ |
|-------------------------------------------------------------|------|--------|--------|---------------|-------|-------------|-------------|
| K + P <sup>2</sup> + pH                                     | 6    | -98.53 | 219.86 | 4.37          | 0.02  | 0.53        | 0.71        |
| K + P + pH                                                  | 6    | -98.17 | 219.96 | 4.47          | 0.02  | 0.52        | 0.73        |
| K <sup>2</sup> + P + pH                                     | 6    | -97.93 | 219.96 | 4.48          | 0.02  | 0.54        | 0.68        |
| P + P <sup>2</sup> + pH                                     | 6    | -98.63 | 220.40 | 4.91          | 0.01  | 0.55        | 0.70        |
| Mg <sup>2</sup> + P <sup>2</sup> + pH                       | 6    | -98.70 | 220.44 | 4.95          | 0.01  | 0.54        | 0.69        |
| Mg <sup>2</sup> + P + pH                                    | 6    | -98.69 | 220.90 | 5.41          | 0.01  | 0.53        | 0.70        |
| K <sup>2</sup> + Mg + P <sup>2</sup> + pH                   | 7    | -96.12 | 220.91 | 5.42          | 0.01  | 0.56        | 0.68        |
| Mg + Mg <sup>2</sup> + P <sup>2</sup> + pH                  | 7    | -96.34 | 221.00 | 5.51          | 0.01  | 0.55        | 0.70        |
| Mg + P + P <sup>2</sup> + pH                                | 7    | -96.61 | 221.37 | 5.88          | 0.01  | 0.56        | 0.70        |
| Mg + Mg <sup>2</sup> + P + pH                               | 7    | -96.32 | 221.51 | 6.03          | 0.01  | 0.53        | 0.71        |
| K <sup>2</sup> + Mg + P + pH                                | 7    | -96.15 | 221.53 | 6.04          | 0.01  | 0.54        | 0.68        |
| K + Mg + P <sup>2</sup> + pH                                | 7    | -96.61 | 221.53 | 6.04          | 0.01  | 0.56        | 0.69        |
| K + Mg + Mg <sup>2</sup> + pH                               | 7    | -96.09 | 221.54 | 6.05          | 0.01  | 0.53        | 0.71        |
| K + K <sup>2</sup> + Mg + pH                                | 7    | -95.95 | 221.56 | 6.08          | 0.01  | 0.54        | 0.68        |
| K + K <sup>2</sup> + Mg <sup>2</sup> + pH                   | 7    | -95.91 | 221.79 | 6.30          | 0.01  | 0.52        | 0.70        |
| K <sup>2</sup> + Mg <sup>2</sup> + P <sup>2</sup> + pH      | 7    | -96.31 | 222.15 | 6.66          | 0.01  | 0.55        | 0.68        |
| K + K <sup>2</sup> + P <sup>2</sup> + pH                    | 7    | -96.57 | 222.21 | 6.72          | 0.01  | 0.53        | 0.69        |
| K <sup>2</sup> + P + P <sup>2</sup> + pH                    | 7    | -96.46 | 222.22 | 6.74          | 0.01  | 0.56        | 0.68        |
| K <sup>2</sup> + Mg + Mg <sup>2</sup> + P <sup>2</sup> + pH | 8    | -93.73 | 222.25 | 6.77          | 0.01  | 0.56        | 0.68        |
| K + K <sup>2</sup> + Mg + Mg <sup>2</sup> + pH              | 8    | -93.37 | 222.32 | 6.84          | 0.01  | 0.56        | 0.68        |
| K + K <sup>2</sup> + P + pH                                 | 7    | -96.21 | 222.33 | 6.84          | 0.01  | 0.52        | 0.71        |
| K + P + P <sup>2</sup> + pH                                 | 7    | -96.75 | 222.38 | 6.89          | 0.01  | 0.53        | 0.73        |
| K + Mg + P + pH                                             | 7    | -96.50 | 222.44 | 6.95          | 0.00  | 0.52        | 0.71        |

Table S6.Continued

| Model                           | $df$ | logLik  | AICc   | $\Delta AICc$ | $w_i$ | $R_{(m)}^2$ | $R_{(c)}^2$ |
|---------------------------------|------|---------|--------|---------------|-------|-------------|-------------|
| Grasslands                      |      |         |        |               |       |             |             |
| $K^2 + P + P^2 + pH$            | 7    | -150.87 | 330.86 | 0.00          | 0.14  | 0.44        | 0.48        |
| $K^2 + P + pH$                  | 6    | -154.18 | 331.38 | 0.52          | 0.11  | 0.41        | 0.42        |
| $K + P + P^2 + pH$              | 7    | -151.53 | 331.69 | 0.83          | 0.10  | 0.41        | 0.50        |
| $K + K^2 + P + P^2 + pH$        | 8    | -148.73 | 331.94 | 1.08          | 0.08  | 0.44        | 0.49        |
| $P + P^2 + pH$                  | 6    | -154.45 | 332.43 | 1.58          | 0.07  | 0.39        | 0.46        |
| $K + K^2 + P + pH$              | 7    | -152.53 | 333.51 | 2.65          | 0.04  | 0.41        | 0.43        |
| $K^2 + Mg + P + pH$             | 7    | -152.49 | 333.55 | 2.69          | 0.04  | 0.41        | 0.43        |
| $K^2 + Mg^2 + P + P^2 + pH$     | 8    | -149.57 | 333.64 | 2.78          | 0.04  | 0.43        | 0.48        |
| $K^2 + Mg^2 + P + pH$           | 7    | -152.72 | 333.70 | 2.84          | 0.03  | 0.41        | 0.42        |
| $K^2 + Mg + P + P^2 + pH$       | 8    | -149.38 | 333.72 | 2.86          | 0.03  | 0.43        | 0.48        |
| $K + Mg^2 + P + P^2 + pH$       | 8    | -150.07 | 333.98 | 3.12          | 0.03  | 0.42        | 0.50        |
| $K + P + P^2$                   | 6    | -155.05 | 334.13 | 3.28          | 0.03  | 0.34        | 0.47        |
| $K + Mg + P + P^2 + pH$         | 8    | -149.85 | 334.22 | 3.37          | 0.03  | 0.41        | 0.50        |
| $Mg^2 + P + P^2 + pH$           | 7    | -153.02 | 334.70 | 3.84          | 0.02  | 0.39        | 0.46        |
| $K + K^2 + Mg^2 + P + P^2 + pH$ | 9    | -147.41 | 334.84 | 3.99          | 0.02  | 0.44        | 0.49        |
| $K + K^2 + Mg + P + P^2 + pH$   | 9    | -147.20 | 334.96 | 4.10          | 0.02  | 0.43        | 0.50        |
| $K + K^2 + P + P^2$             | 7    | -152.49 | 335.06 | 4.20          | 0.02  | 0.36        | 0.46        |
| $Mg + P + P^2 + pH$             | 7    | -152.88 | 335.06 | 4.20          | 0.02  | 0.38        | 0.47        |
| $K + K^2 + Mg + P + pH$         | 8    | -150.86 | 335.84 | 4.99          | 0.01  | 0.40        | 0.43        |
| $P + pH$                        | 5    | -158.97 | 335.85 | 5.00          | 0.01  | 0.31        | 0.37        |
| $K + K^2 + Mg^2 + P + pH$       | 8    | -151.07 | 335.92 | 5.06          | 0.01  | 0.40        | 0.43        |
| $K^2 + P + P^2$                 | 6    | -155.62 | 336.19 | 5.33          | 0.01  | 0.34        | 0.43        |
| $K + P + pH$                    | 6    | -156.50 | 336.30 | 5.44          | 0.01  | 0.32        | 0.42        |

Table S6.Continued

| Model                                | <i>df</i> | logLik  | AICc   | $\Delta$ AICc | $w_i$ | $R_{(m)}^2$ | $R_{(c)}^2$ |
|--------------------------------------|-----------|---------|--------|---------------|-------|-------------|-------------|
| $K^2 + Mg + Mg^2 + P + pH$           | 8         | -150.84 | 336.38 | 5.53          | 0.01  | 0.40        | 0.43        |
| $K^2 + Mg + Mg^2 + P + P^2 + pH$     | 9         | -147.73 | 336.67 | 5.81          | 0.01  | 0.43        | 0.48        |
| $K + Mg^2 + P + P^2$                 | 7         | -153.80 | 336.77 | 5.91          | 0.01  | 0.33        | 0.47        |
| $K + Mg + P + P^2$                   | 7         | -153.51 | 336.83 | 5.97          | 0.01  | 0.33        | 0.47        |
| $K + Mg + Mg^2 + P + P^2 + pH$       | 9         | -148.15 | 337.00 | 6.14          | 0.01  | 0.41        | 0.50        |
| $K^2 + Mg + P$                       | 6         | -156.48 | 337.40 | 6.54          | 0.01  | 0.33        | 0.41        |
| $Mg + Mg^2 + P + P^2 + pH$           | 8         | -151.11 | 337.58 | 6.72          | 0.01  | 0.39        | 0.47        |
| $K + K^2 + Mg + P + P^2$             | 8         | -150.83 | 337.59 | 6.73          | 0.00  | 0.37        | 0.47        |
| $K + K^2 + Mg^2 + P + P^2$           | 8         | -151.09 | 337.63 | 6.77          | 0.00  | 0.36        | 0.46        |
| $P + P^2$                            | 5         | -159.25 | 337.68 | 6.82          | 0.00  | 0.28        | 0.41        |
| $K^2 + P$                            | 5         | -159.26 | 337.73 | 6.88          | 0.00  | 0.27        | 0.37        |
| $K^2 + Mg + P + P^2$                 | 7         | -153.61 | 337.77 | 6.91          | 0.00  | 0.35        | 0.45        |
| $K + K^2 + P$                        | 6         | -156.70 | 337.91 | 7.05          | 0.00  | 0.29        | 0.41        |
| $K + K^2 + Mg + Mg^2 + P + P^2 + pH$ | 10        | -145.55 | 338.04 | 7.19          | 0.00  | 0.43        | 0.49        |
| $K^2 + P + P^2 + pH$                 | 7         | -150.87 | 330.86 | 0.00          | 0.14  | 0.44        | 0.48        |
